# Supplementary material for: Microfluidic co-cultures with hydrogel-based ligand trap to study paracrine signals giving rise to cancer drug resistance
Source: Royal Society of Chemistry journal article supplement (doi:10.1039/c5lc00948k), 2015-01-01

## **Supplementary Information**

### **Microfluidic Co-Cultures with Hydrogel-Based Ligand Trap to Study Paracrine Signals Giving Rise to Cancer Drug Resistance**

#### **Authors:**

Dipali Patel <sup>a</sup>, Yandong Gao <sup>a</sup>, Kyungjin Son <sup>a</sup>, Christian Siltanen <sup>a</sup>, Richard M. Neve <sup>b</sup>, Katherine Ferrara <sup>a</sup>, Alexander Revzin <sup>a,\*</sup>

#### **Affiliation:**

<sup>a</sup> *Department of Biomedical Engineering, One Shields Ave., University of California, Davis, CA, 95618*

<sup>b</sup> *Department of Discovery Oncology, Genentech Inc., 1 DNA Way, South San Francisco, CA, 94080, USA.*

## **Supplementary Figure Legends**

**Supplementary Figure 1.** Dose-dependent response curve of A375 cells to vemurafenib in microchambers. Cell viability assays show cells starting to die off after exposure to 1  $\mu$ M of vemurafenib.

**Supplementary Figure 2.** Changes in average FGF-2 concentration inside the cell channels having regular hydrogel barrier (red) or anti-FGF antibodies-containing hydrogel barrier (black): (A) resistant cell channel and (B) sensitive cell channel. Over a 12-hour period, there is a ~3-fold decrease in FGF-2 concentration in resistant cell chamber and undetectable levels of the protein in the sensitive cell chamber.

**Supplementary Figure 1**

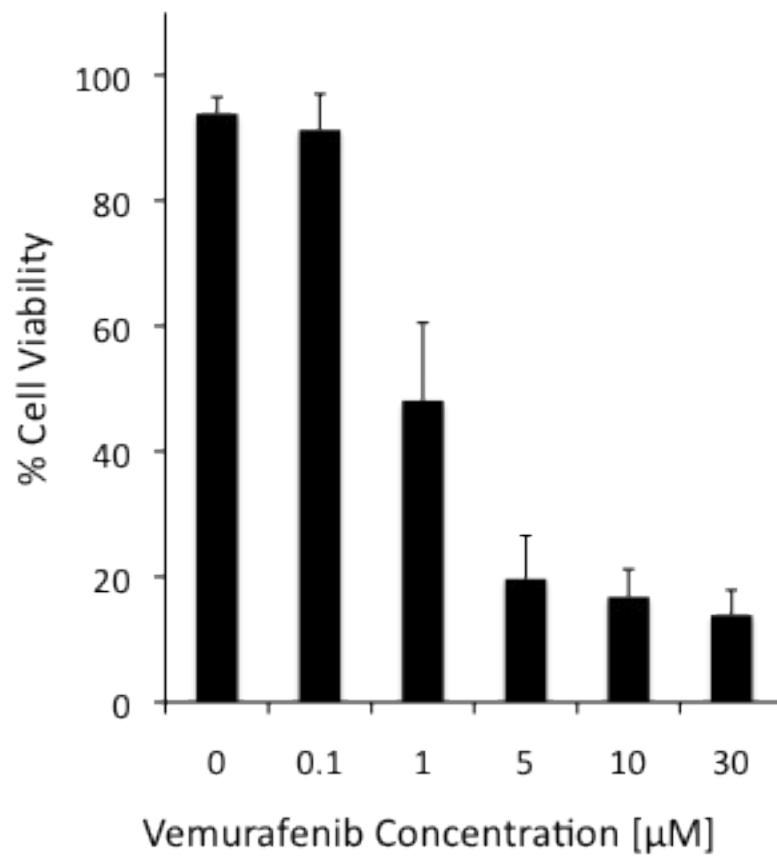

Supplementary Figure 2

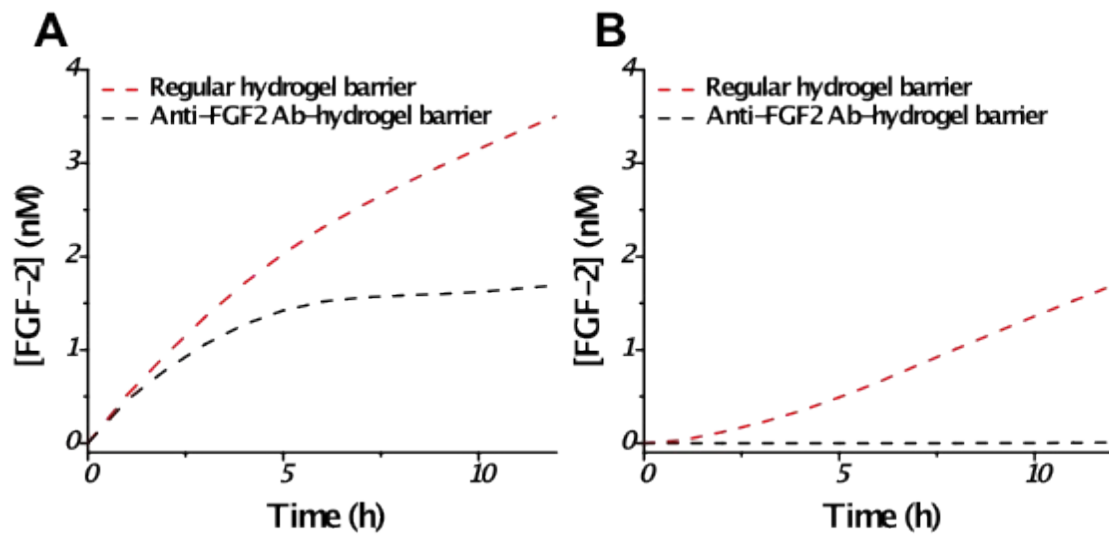

Supplement: c5lc00948k1.pdf [file c5lc00948k1.pdf]
